# Supplementary material for: Ameliorative effect of quercetin nanorods on diabetic mice: mechanistic and therapeutic strategies
Source: Royal Society of Chemistry journal article supplement (doi:10.1039/c6ra04821h), 2016-01-01
Supplement: c6ra04821h1.pdf [file c6ra04821h1.pdf]

### Supplementary data

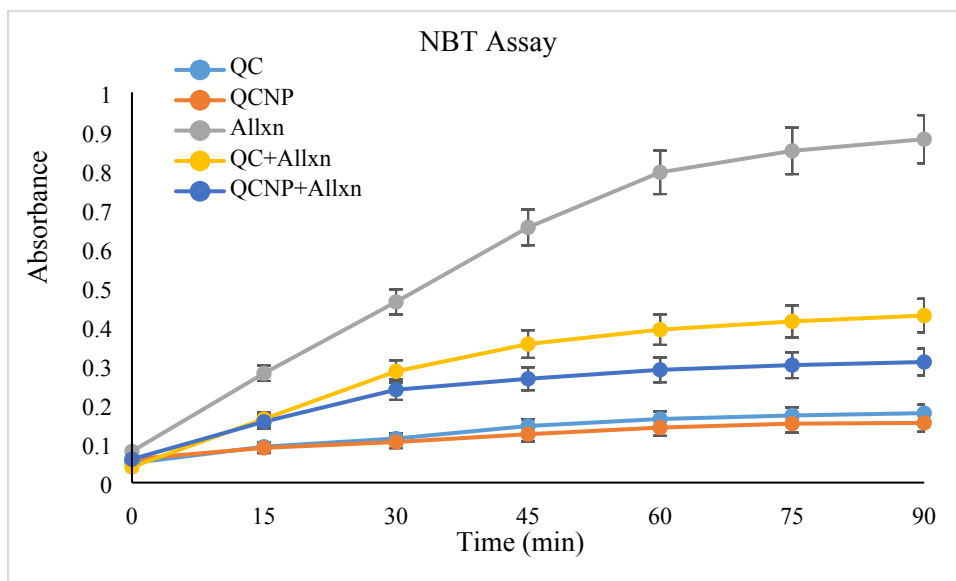

**Figure 1S.** NBT Assay for superoxide anion generation.

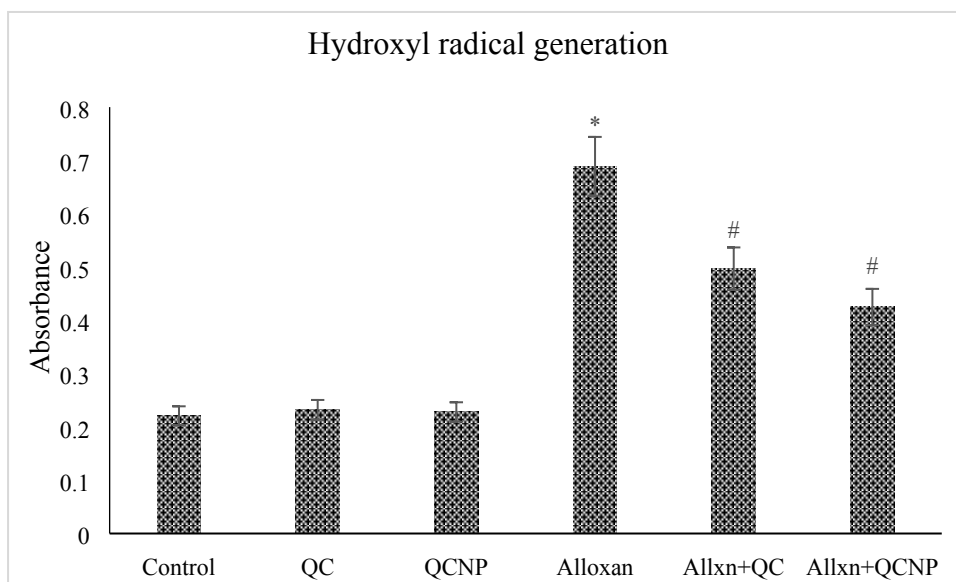

**Figure 2S.** Hydroxyl radical generations. All the data have been expressed in mean  $\pm$  SEM for five different preparation of each sample of three independent experiments. \* indicates significantly different from control at  $p \leq 0.05$ . # indicates significantly different from diabetic group at  $p \leq 0.03$ .

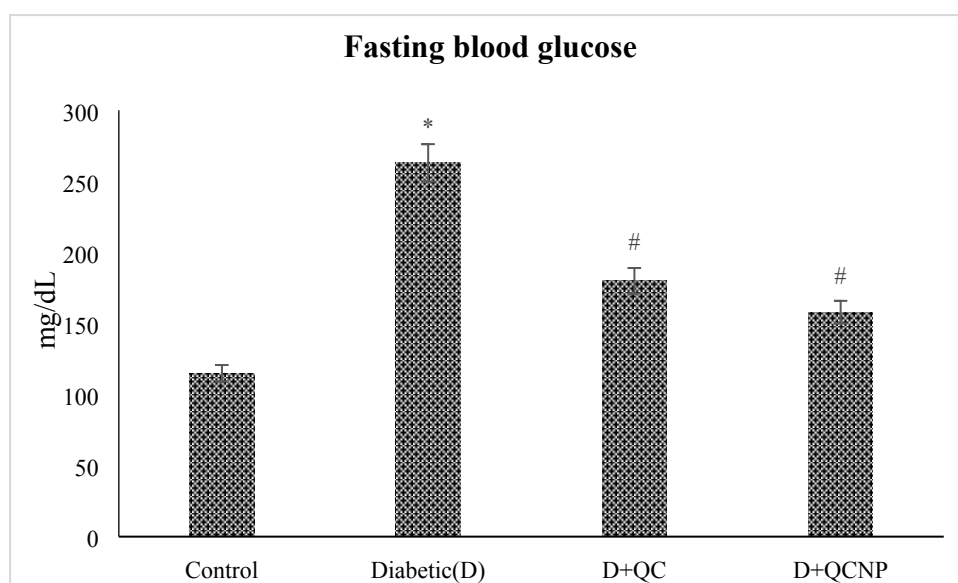

**Figure 3S.** Fasting blood glucose of control, diabetic, diabetic group treated with quercetin and quercetin nanoparticle. All the data have been expressed in mean  $\pm$  SEM for five different preparation of each sample of three independent experiments. \* indicates significantly different from control at  $p \leq 0.05$ . # indicates significantly different from diabetic group at  $p \leq 0.03$ .

| Parameters                         | Samples  | Control           | Diabetic          | Diabetic+QC       | Diabetic+QCNP      |
|------------------------------------|----------|-------------------|-------------------|-------------------|--------------------|
| SOD<br>(unit/mg protein/min)       | Liver    | 118.62 $\pm$ 4.65 | 80.98 $\pm$ 2.87* | 104.18 $\pm$ 4.5# | 112.86 $\pm$ 4.76# |
|                                    | Kidney   | 90.26 $\pm$ 2.34  | 65.50 $\pm$ 1.78* | 78.54 $\pm$ 2.9#  | 82.12 $\pm$ 2.21#  |
|                                    | Pancreas | 28.91 $\pm$ 1.12  | 14.52 $\pm$ 0.45* | 17.22 $\pm$ 1.5   | 22.80 $\pm$ 0.32#  |
| Catalase<br>(nmole/mg protein/min) | Liver    | 36.44 $\pm$ 0.42  | 24.86 $\pm$ 0.28* | 30.51 $\pm$ 1.8   | 32.34 $\pm$ 0.52#  |
|                                    | Kidney   | 34.61 $\pm$ 0.55  | 12.65 $\pm$ 0.18* | 23.65 $\pm$ 1.7#  | 28.83 $\pm$ 0.23#  |
|                                    | Pancreas | 16.76 $\pm$ 0.10  | 5.43 $\pm$ 0.05*  | 8.55 $\pm$ 1.1    | 12.48 $\pm$ 0.07#  |
| GSH<br>(nmole/gram tissue)         | Liver    | 48.81 $\pm$ 1.78  | 36.04 $\pm$ 1.90* | 41.89 $\pm$ 2.3   | 45.90 $\pm$ 2.11#  |
|                                    | Kidney   | 62.13 $\pm$ 2.41  | 43.06 $\pm$ 1.81* | 49.12 $\pm$ 3.1#  | 57.10 $\pm$ 2.18#  |
|                                    | Pancreas | 74.93 $\pm$ 4.17  | 58.23 $\pm$ 2.24* | 68.29 $\pm$ 4.12# | 70.60 $\pm$ 2.56#  |

**Table 1S.** Antioxidant parameters of Control, Diabetic, Diabetic group treated with quercetin and quercetin nanoparticle. All the data have been expressed in mean  $\pm$  SEM for five different preparation of each sample of three independent experiments. \* indicates significantly different from control at  $p \leq 0.05$ . # indicates significantly different from diabetic group at  $p \leq 0.05$ .
